# Supplementary material
Source: PubMed Central journal article supplement (PMC2878099)
Supplement: kwp345_1.pdf [file kwp345_1.pdf]

**Web Appendix: Sample input data, SAS code, and output for the maximized sequential probability ratio test using a binomial probability model to implement self-controlled case series and difference-in-difference analyses.**

**Web Table 1: Input data for sample outcome:**

| Week start date | Cumulative number of 1 <sup>st</sup> TIV doses | cumDxVac (cumulative number of events in risk window) | cumPC (cumulative number of events in control window) |
|-----------------|------------------------------------------------|-------------------------------------------------------|-------------------------------------------------------|
| 7-Sep-08        | 898                                            | 0                                                     | 1                                                     |
| 28-Sep-08       | 48,023                                         | 1                                                     | 1                                                     |
| 12-Oct-08       | 190,043                                        | 2                                                     | 8                                                     |
| 19-Oct-08       | 377,943                                        | 2                                                     | 14                                                    |
| 26-Oct-08       | 523,936                                        | 2                                                     | 17                                                    |
| 2-Nov-08        | 1,067,548                                      | 14                                                    | 47                                                    |
| 9-Nov-08        | 1,161,599                                      | 15                                                    | 52                                                    |
| 16-Nov-08       | 1,292,667                                      | 17                                                    | 54                                                    |
| 23-Nov-08       | 1,363,612                                      | 19                                                    | 57                                                    |
| 30-Nov-08       | 1,421,750                                      | 19                                                    | 61                                                    |
| 7-Dec-08        | 1,477,088                                      | 20                                                    | 67                                                    |
| 14-Dec-08       | 1,560,261                                      | 21                                                    | 68                                                    |

### Variable definitions for SAS code:

data1 = Dataset name

ratio = Ratio of number of days in risk window vs. control window for sample outcome: 0.35

&b/&a = Number of events in risk window vs. control window of cumulative previous seasons  
for sample outcome = 0.258

### SAS code:

```
*****  
Self-controlled case series  
*****;  
data SCCS;  
  set data1;  
  format relativeRisk logLikelihoodRatio 6.4;  
  cumtotal = cumPC + cumDxVac;  
  if cumPC gt 0 then relativeRisk = cumDxVac / (cumPC *  
  ratio);  
  if cumDxVac gt 0 and cumTotal gt 0 then lla = cumDxVac *  
    log(cumDxVac/cumTotal);  
  else lla = 0;  
  if cumTotal gt cumDxVac then llb = cumPC * log(1 -  
    cumDxVac/cumTotal);  
  else llb = 0;  
  llc = - cumDxVac * log(1 / (1/ratio + 1));  
  lld = - cumPC * log(1 - (1 / (1/ratio + 1)));  
  if (cumDxVac * 1/ratio) gt cumPC then logLikelihoodRatio =  
    sum(lla, llb, llc, lld);  
  else logLikelihoodRatio = 0;  
run;
```

```

*****
Difference-in-difference
*****;
data DiD;
  set data1;
  format relativeRisk logLikelihoodRatio 6.4;
  cumtotal = cumPC + cumDxVac;
  %let d = cumDxVac;
  %let c = cumPC;
  if cumPC gt 0 and &a gt 0 then relativeRisk = (cumDxVac
    /cumPC)/(&b/&a);
  %let currentSum = sum(&c,&d);
  %let pastSum = sum(&a,&b);
  currentSum = sum(&c,&d);
  pastSum = sum(&a,&b);
  if &currentSum gt 0 then do;
    l1a = &d * log(&d/&currentSum);
    l1b = &c * log(&c/&currentSum);
  end;
  else do;
    l1a = 0;
    l1b = 0;
  end;
  if &pastSum gt 0 then do;
    l1c = - &d * log(&b/&pastSum);
    l1d = - &c * log(&a/&pastSum);
  end;
  else do;
    l1c = 0;
    l1d = 0;
  end;
  if relativeRisk gt 1 then logLikelihoodRatio =
  sum(l1a,l1b,l1c,l1d);
  else logLikelihoodRatio = 0;
run;

```

**Web Table 2: SCCS sample output:**

| Week start date | Relative risk | Log-likelihood ratio |
|-----------------|---------------|----------------------|
| 7-Sep-08        | 0             | 0                    |
| 28-Sep-08       | 2.8571        | 0.2637               |
| 12-Oct-08       | 0.7143        | 0                    |
| 19-Oct-08       | 0.4082        | 0                    |
| 26-Oct-08       | 0.3361        | 0                    |
| 2-Nov-08        | 0.8511        | 0                    |
| 16-Nov-08       | 0.8242        | 0                    |
| 9-Nov-08        | 0.8995        | 0                    |
| 23-Nov-08       | 0.9524        | 0                    |
| 30-Nov-08       | 0.8899        | 0                    |
| 30-Nov-08       | 0.8529        | 0                    |
| 14-Dec-08       | 0.8824        | 0                    |

**Web Table 3: DiD sample output:**

| Week start date | Relative risk ratio | Log-likelihood ratio |
|-----------------|---------------------|----------------------|
| 7-Sep-08        | 0                   | 0                    |
| 28-Sep-08       | 3.8686              | 0.4264               |
| 12-Oct-08       | 0.9672              | 0                    |
| 19-Oct-08       | 0.5527              | 0                    |
| 26-Oct-08       | 0.4551              | 0                    |
| 2-Nov-08        | 1.1524              | 0.1057               |
| 16-Nov-08       | 1.1159              | 0.0686               |
| 9-Nov-08        | 1.2179              | 0.2426               |
| 23-Nov-08       | 1.2895              | 0.4409               |
| 30-Nov-08       | 1.205               | 0.2436               |
| 30-Nov-08       | 1.1548              | 0.1554               |
| 14-Dec-08       | 1.1947              | 0.2459               |

The code and output for this paper was generated using SAS software, Version 9.1.3 of the SAS System for Windows. Copyright © 2002-2003 SAS Institute Inc. SAS and all other SAS Institute Inc. product or service names are registered trademarks or trademarks of SAS Institute Inc., Cary, NC, USA.
